# Supplementary material for: Stronger winds increase the sand-dust storm risk in northern China
Source: Royal Society of Chemistry journal article supplement (doi:10.1039/d2ea00058j), 2022-01-01
Supplement: d2ea00058j1.pdf [file d2ea00058j1.pdf]

1           **Stronger spring winds increase sand-dust storm risk in northern China**

2                   Yi Liu<sup>1</sup>, Rongrong Xu<sup>1\*</sup>, Alan D. Ziegler<sup>2</sup>, Zhenzhong Zeng<sup>1\*</sup>

3   <sup>1</sup> School of Environmental Science and Engineering, Southern University of Science  
4 and Technology, Shenzhen, China

5   <sup>2</sup> Faculty of Fisheries Technology and Aquatic Resources, Mae Jo University, Chiang  
6 Mai, Thailand

7   \* Correspondence: [zengzz@sustech.edu.cn](mailto:zengzz@sustech.edu.cn) (Z. Zeng); [xurr@sustech.edu.cn](mailto:xurr@sustech.edu.cn) (R. Xu)

8

9                   Manuscript for *Environmental Science: Atmospheres*

10                                   September 12th, 2022

11 **Figure S1. Explanation of how overall wind speed decreases sand-dust storm frequency and average wind speed.** Bars demonstrate  
 12 randomly generated instant wind speed. The black line shows the sand-dust storm initiation wind speed (*e.g.*,  $12 \text{ m s}^{-1}$ )<sup>1</sup>. The red dots on the top  
 13 indicate sand-dust storms. The numbers below the red dots are the recorded wind speed during sand-dust storms. Taking the average of them, we  
 14 will get the average wind speed during sand-dust storms in that situation. The left and right figures show high and low wind speed (high wind  
 15 speed distribution minus  $5 \text{ m s}^{-1}$ ) situations respectively.

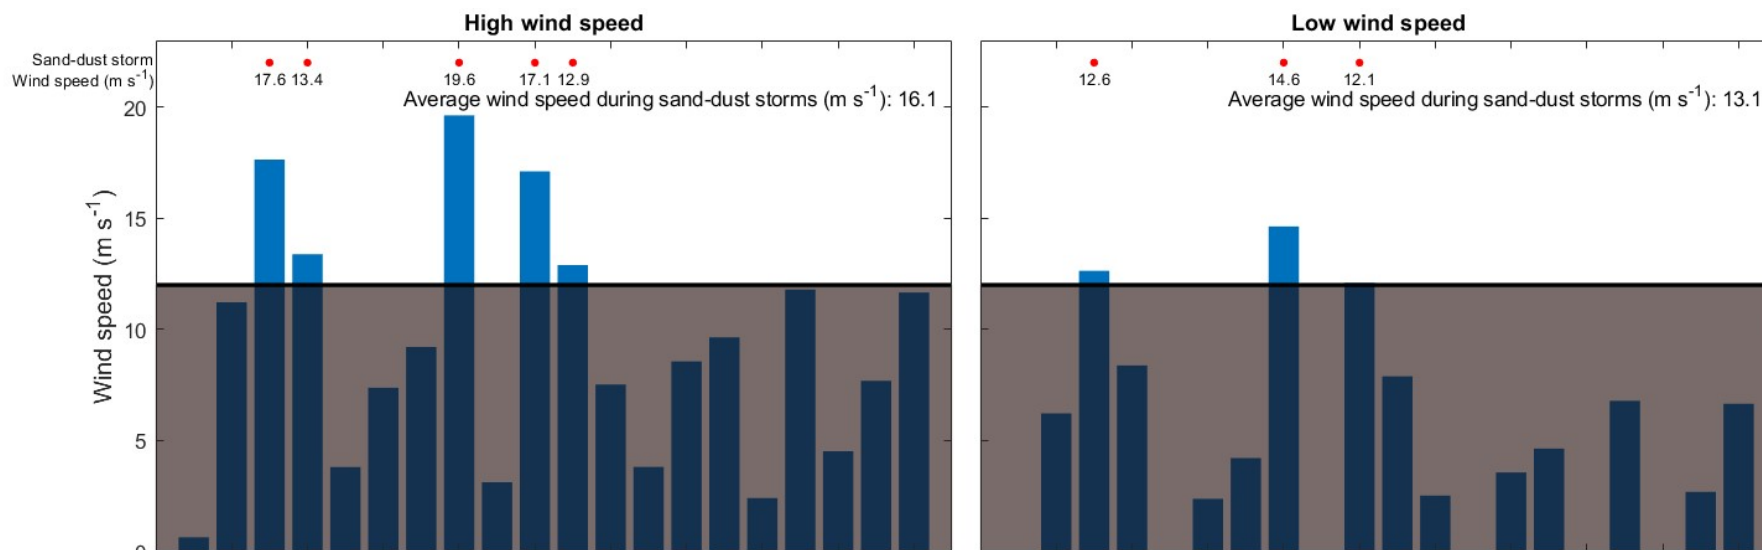

16  
 17  
 18

19 **Figure S2. Explanation of how ecological restoration (higher sand-dust storm initiation wind speed) decreases sand-dust storm**  
 20 **frequency but increases average sand-dust storm wind speed.** Bars demonstrate randomly generated instant wind speed. The red dots on the  
 21 top indicate sandstorm events. The left and right figures show low sand-dust storm initiation wind speed, *e.g.*, 12 m s<sup>-1</sup> and high sand-dust storm  
 22 initiation wind speed, *e.g.*, 15 m s<sup>-1</sup> respectively<sup>1</sup>.

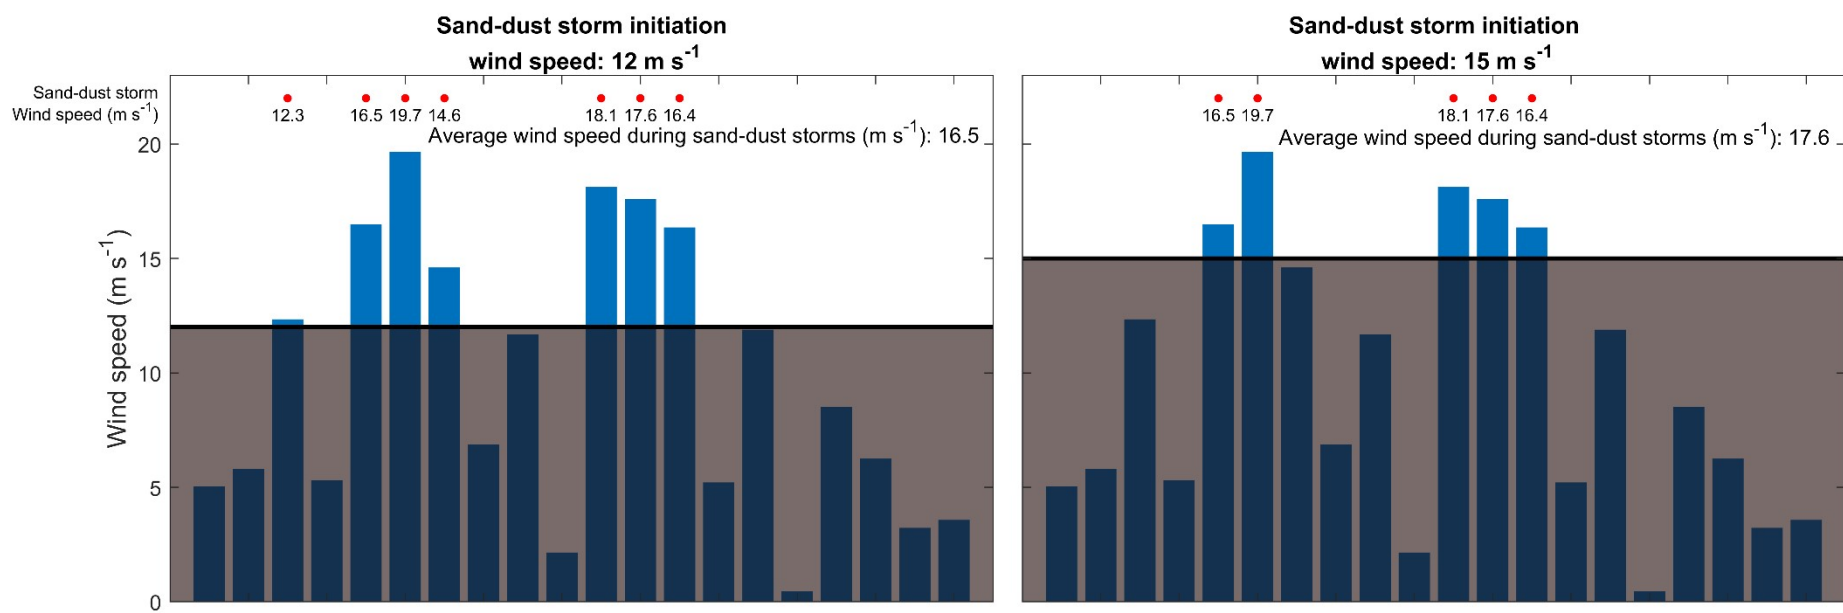

23  
 24  
 25

26 Figure S3. Jump of sand-dust days data and extreme precipitation data in Mongolia.

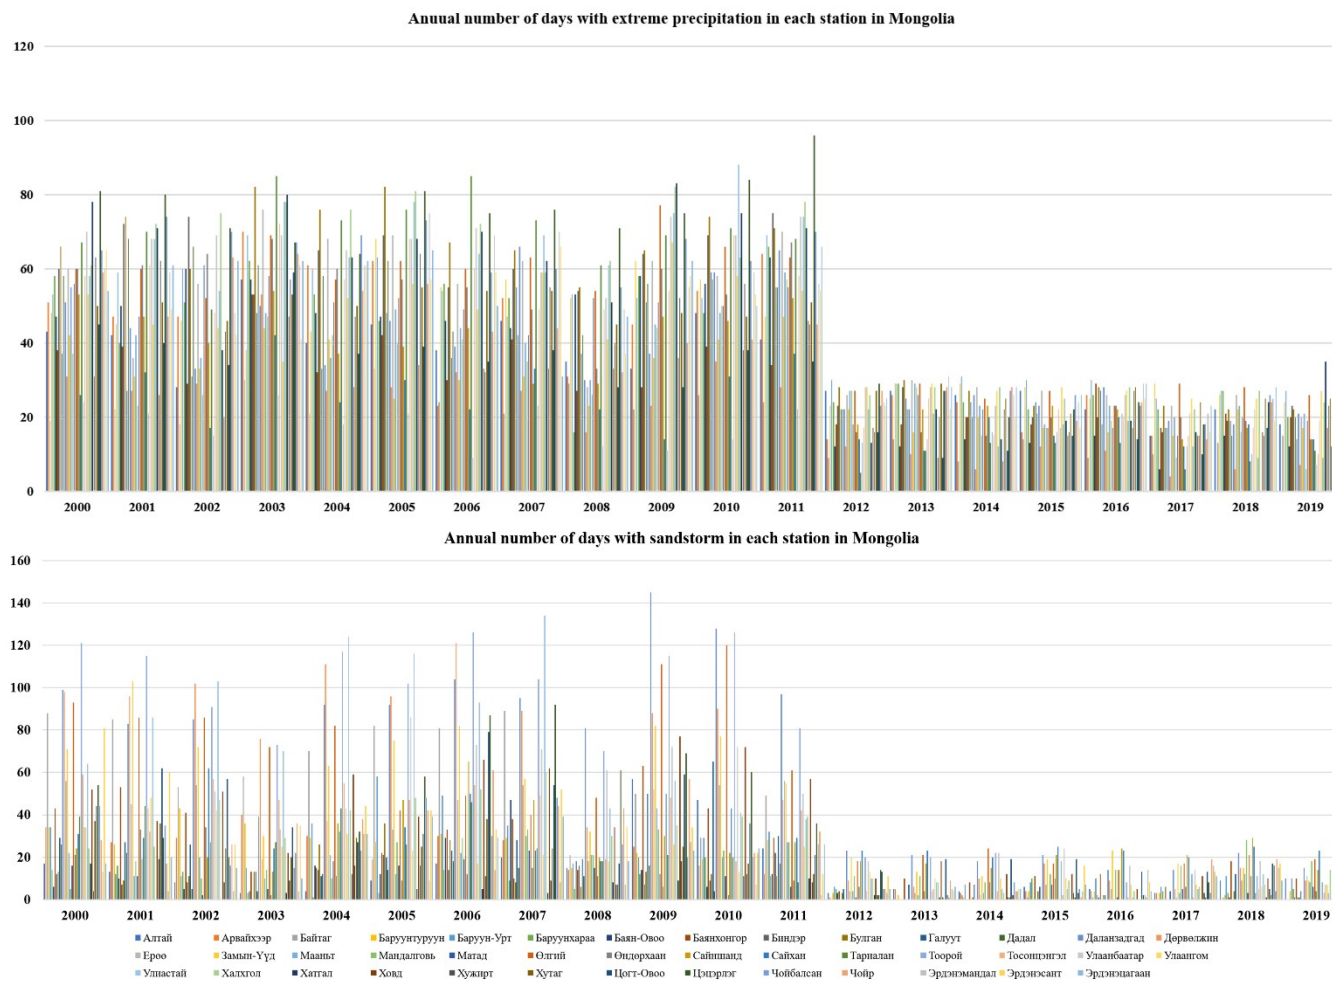

28 **References.**

- 29 1. Kurosaki Y, Mikami, M. Threshold wind speed for dust emission in east Asia and  
30 its seasonal variations, *Journal of Geophysical Research*. 2007 September 6;  
31 112:D17202.
